# Supplementary material
Source: PubMed Central journal article supplement (PMC8851543)
Supplement: NIHMS1006087-supplement-1.pdf [file NIHMS1006087-supplement-1.pdf]

SUPPLEMENTARY DATA

**Supplementary Table S1.** Annual Diabetes-Attributable Total and Per-Person Direct Medical Costs by State and Payer, 2017.

| State                | Medical Costs (in millions, 2017 dollars) |          |          |          | Medical Costs Per Patient* (2017 dollars) |          |         |          | Percentage of Total Costs |          |       |
|----------------------|-------------------------------------------|----------|----------|----------|-------------------------------------------|----------|---------|----------|---------------------------|----------|-------|
|                      | Medicaid                                  | Medicare | Other    | Total    | Medicaid                                  | Medicare | Other   | Total    | Medicaid                  | Medicare | Other |
| Alabama              | \$443                                     | \$1,545  | \$2,153  | \$4,142  | \$3,313                                   | \$6,411  | \$4,142 | \$7,967  | 11%                       | 37%      | 52%   |
| Alaska               | \$87                                      | \$73     | \$283    | \$442    | \$7,305                                   | \$5,140  | \$7,201 | \$11,262 | 20%                       | 16%      | 64%   |
| Arizona              | \$456                                     | \$1,220  | \$1,869  | \$3,545  | \$2,977                                   | \$5,878  | \$3,475 | \$6,591  | 13%                       | 34%      | 53%   |
| Arkansas             | \$191                                     | \$746    | \$1,041  | \$1,978  | \$3,325                                   | \$6,214  | \$3,930 | \$7,470  | 10%                       | 38%      | 53%   |
| California           | \$3,467                                   | \$7,748  | \$11,665 | \$22,881 | \$2,561                                   | \$6,400  | \$3,881 | \$7,612  | 15%                       | 34%      | 51%   |
| Colorado             | \$287                                     | \$627    | \$1,200  | \$2,114  | \$5,080                                   | \$5,494  | \$4,604 | \$8,114  | 14%                       | 30%      | 57%   |
| Connecticut          | \$479                                     | \$828    | \$1,408  | \$2,715  | \$6,598                                   | \$7,208  | \$5,830 | \$11,243 | 18%                       | 31%      | 52%   |
| Delaware             | \$104                                     | \$240    | \$463    | \$807    | \$4,095                                   | \$6,505  | \$5,674 | \$9,891  | 13%                       | 30%      | 57%   |
| District of Columbia | \$126                                     | \$129    | \$301    | \$556    | \$5,116                                   | \$7,911  | \$7,010 | \$12,953 | 23%                       | 23%      | 54%   |
| Florida              | \$1,241                                   | \$6,039  | \$7,002  | \$14,282 | \$2,925                                   | \$6,971  | \$3,982 | \$8,122  | 9%                        | 42%      | 49%   |
| Georgia              | \$480                                     | \$2,116  | \$3,324  | \$5,920  | \$3,352                                   | \$6,385  | \$4,042 | \$7,199  | 8%                        | 36%      | 56%   |
| Hawaii               | \$82                                      | \$198    | \$449    | \$729    | \$4,107                                   | \$4,884  | \$4,822 | \$7,821  | 11%                       | 27%      | 62%   |
| Idaho                | \$72                                      | \$231    | \$425    | \$729    | \$4,592                                   | \$4,684  | \$4,256 | \$7,299  | 10%                       | 32%      | 58%   |
| Illinois             | \$994                                     | \$3,163  | \$4,538  | \$8,695  | \$3,729                                   | \$6,687  | \$4,568 | \$8,752  | 11%                       | 36%      | 52%   |
| Indiana              | \$541                                     | \$1,580  | \$2,537  | \$4,658  | \$5,476                                   | \$6,070  | \$4,559 | \$8,373  | 12%                       | 34%      | 54%   |
| Iowa                 | \$257                                     | \$660    | \$1,119  | \$2,037  | \$4,111                                   | \$5,633  | \$4,913 | \$8,937  | 13%                       | 32%      | 55%   |
| Kansas               | \$193                                     | \$574    | \$1,050  | \$1,817  | \$6,374                                   | \$6,133  | \$4,912 | \$8,501  | 11%                       | 32%      | 58%   |
| Kentucky             | \$316                                     | \$1,253  | \$1,601  | \$3,171  | \$3,855                                   | \$6,731  | \$4,355 | \$8,626  | 10%                       | 40%      | 50%   |
| Louisiana            | \$477                                     | \$1,385  | \$1,702  | \$3,565  | \$3,653                                   | \$7,552  | \$4,080 | \$8,544  | 13%                       | 39%      | 48%   |
| Maine                | \$211                                     | \$321    | \$549    | \$1,081  | \$4,673                                   | \$5,849  | \$5,307 | \$10,454 | 20%                       | 30%      | 51%   |
| Maryland             | \$442                                     | \$1,281  | \$2,487  | \$4,209  | \$5,317                                   | \$6,906  | \$5,430 | \$9,194  | 10%                       | 30%      | 59%   |
| Massachusetts        | \$897                                     | \$1,648  | \$2,887  | \$5,433  | \$5,723                                   | \$7,577  | \$6,223 | \$11,708 | 17%                       | 30%      | 53%   |
| Michigan             | \$798                                     | \$2,665  | \$3,605  | \$7,067  | \$4,507                                   | \$6,974  | \$4,489 | \$8,802  | 11%                       | 38%      | 51%   |
| Minnesota            | \$585                                     | \$930    | \$1,629  | \$3,144  | \$5,409                                   | \$5,882  | \$5,165 | \$9,971  | 19%                       | 30%      | 52%   |
| Mississippi          | \$306                                     | \$978    | \$1,246  | \$2,531  | \$3,909                                   | \$7,246  | \$4,216 | \$8,567  | 12%                       | 39%      | 49%   |
| Missouri             | \$527                                     | \$1,481  | \$2,323  | \$4,331  | \$6,027                                   | \$7,119  | \$5,099 | \$9,509  | 12%                       | 34%      | 54%   |
| Montana              | \$63                                      | \$157    | \$303    | \$522    | \$6,207                                   | \$5,066  | \$4,887 | \$8,433  | 12%                       | 30%      | 58%   |
| Nebraska             | \$123                                     | \$363    | \$732    | \$1,219  | \$6,172                                   | \$5,986  | \$5,538 | \$9,214  | 10%                       | 30%      | 60%   |
| Nevada               | \$116                                     | \$471    | \$890    | \$1,477  | \$3,757                                   | \$5,310  | \$4,325 | \$7,175  | 8%                        | 32%      | 60%   |

SUPPLEMENTARY DATA

|                |          |          |           |           |          |         |         |          |     |     |     |
|----------------|----------|----------|-----------|-----------|----------|---------|---------|----------|-----|-----|-----|
| New Hampshire  | \$101    | \$257    | \$572     | \$929     | \$10,160 | \$5,404 | \$5,799 | \$9,423  | 11% | 28% | 62% |
| New Jersey     | \$720    | \$2,234  | \$3,115   | \$6,069   | \$8,640  | \$7,603 | \$4,840 | \$9,432  | 12% | 37% | 51% |
| New Mexico     | \$212    | \$367    | \$650     | \$1,229   | \$4,226  | \$5,098 | \$3,791 | \$7,173  | 17% | 30% | 53% |
| New York       | \$4,951  | \$5,277  | \$7,140   | \$17,367  | \$6,607  | \$7,636 | \$4,287 | \$10,427 | 29% | 30% | 41% |
| North Carolina | \$794    | \$2,495  | \$3,478   | \$6,766   | \$4,217  | \$5,963 | \$3,980 | \$7,744  | 12% | 37% | 51% |
| North Dakota   | \$44     | \$116    | \$296     | \$457     | \$6,887  | \$5,459 | \$5,772 | \$8,889  | 10% | 25% | 65% |
| Ohio           | \$1,201  | \$3,086  | \$4,538   | \$8,825   | \$5,273  | \$6,598 | \$4,793 | \$9,320  | 14% | 35% | 51% |
| Oklahoma       | \$339    | \$1,011  | \$1,449   | \$2,798   | \$3,515  | \$6,651 | \$4,113 | \$7,944  | 12% | 36% | 52% |
| Oregon         | \$304    | \$667    | \$1,307   | \$2,277   | \$4,217  | \$5,113 | \$4,597 | \$8,014  | 13% | 29% | 57% |
| Pennsylvania   | \$1,618  | \$3,504  | \$5,247   | \$10,369  | \$6,950  | \$7,026 | \$5,041 | \$9,963  | 16% | 34% | 51% |
| Rhode Island   | \$150    | \$248    | \$456     | \$855     | \$7,557  | \$6,736 | \$5,732 | \$10,744 | 18% | 29% | 53% |
| South Carolina | \$389    | \$1,343  | \$1,850   | \$3,582   | \$3,434  | \$5,884 | \$3,962 | \$7,671  | 11% | 37% | 52% |
| South Dakota   | \$40     | \$146    | \$307     | \$494     | \$4,734  | \$5,173 | \$5,146 | \$8,285  | 8%  | 30% | 62% |
| Tennessee      | \$567    | \$1,726  | \$2,572   | \$4,866   | \$4,373  | \$6,470 | \$4,108 | \$7,772  | 12% | 35% | 53% |
| Texas          | \$1,128  | \$5,650  | \$8,691   | \$15,468  | \$3,363  | \$6,712 | \$4,003 | \$7,123  | 7%  | 37% | 56% |
| Utah           | \$89     | \$295    | \$586     | \$969     | \$4,653  | \$4,820 | \$4,085 | \$6,766  | 9%  | 30% | 60% |
| Vermont        | \$76     | \$117    | \$211     | \$404     | \$4,138  | \$5,556 | \$5,278 | \$10,098 | 19% | 29% | 52% |
| Virginia       | \$481    | \$1,536  | \$3,116   | \$5,133   | \$4,451  | \$5,631 | \$4,851 | \$7,993  | 9%  | 30% | 61% |
| Washington     | \$463    | \$1,114  | \$2,172   | \$3,749   | \$4,957  | \$5,006 | \$4,643 | \$8,012  | 12% | 30% | 58% |
| West Virginia  | \$253    | \$693    | \$932     | \$1,878   | \$4,953  | \$6,705 | \$4,764 | \$9,595  | 13% | 37% | 50% |
| Wisconsin      | \$332    | \$1,138  | \$2,008   | \$3,478   | \$3,902  | \$5,946 | \$5,378 | \$9,313  | 10% | 33% | 58% |
| Wyoming        | \$39     | \$84     | \$202     | \$325     | \$8,807  | \$4,867 | \$5,153 | \$8,285  | 12% | 26% | 62% |
| United States  | \$28,651 | \$73,758 | \$111,674 | \$214,084 | \$4,300  | \$6,537 | \$4,419 | \$8,471  | 13% | 34% | 52% |

**Summary:**

|        |         |         |          |          |          |         |         |          |  |  |  |
|--------|---------|---------|----------|----------|----------|---------|---------|----------|--|--|--|
| Median | \$332   | \$978   | \$1,449  | \$2,798  | \$4,592  | \$6,133 | \$4,764 | \$8,544  |  |  |  |
| Min    | \$39    | \$73    | \$202    | \$325    | \$2,561  | \$4,684 | \$3,475 | \$6,591  |  |  |  |
| Max    | \$4,951 | \$7,748 | \$11,665 | \$22,881 | \$10,160 | \$7,911 | \$7,201 | \$12,953 |  |  |  |

**Notes:**

\* Medicare and Medicaid use a denominator of number of persons with diabetes covered by each payer and other payer and total costs use all persons with diabetes as the denominator. "Other payer" and "total costs" are based on all persons with diabetes Other=Private insurance, other payers, and out of pocket costs from patients.

SUPPLEMENTARY DATA

**Supplementary Table S2.** Annual Diabetes-Attributable Total and Per-Person Productivity Losses due to Morbidity by State and Component, 2017.

| State                   | Total Costs (in millions, 2017 dollars) |                  |                      |                 |          | Costs Per Patient (2017 dollars) |                  |                      |                 |         | Percentage of Total Costs     |                  |                      |                 |
|-------------------------|-----------------------------------------|------------------|----------------------|-----------------|----------|----------------------------------|------------------|----------------------|-----------------|---------|-------------------------------|------------------|----------------------|-----------------|
|                         | Present<br>Household<br>eeism           | Producti<br>vity | Unable<br>to<br>Work | Absent<br>eeism | Total    | Present<br>Household<br>eeism    | Producti<br>vity | Unable<br>to<br>Work | Absent<br>eeism | Total   | Present<br>Household<br>eeism | Producti<br>vity | Unable<br>to<br>Work | Absent<br>eeism |
| Alabama                 | \$761                                   | \$130            | \$1,495              | \$128           | \$2,512  | \$1,455                          | \$248            | \$2,857              | \$243           | \$4,803 | 30.3%                         | 5.2%             | 59.5%                | 5.1%            |
| Alaska                  | \$92                                    | \$12             | \$159                | \$16            | \$278    | \$2,332                          | \$301            | \$4,047              | \$422           | \$7,103 | 32.9%                         | 4.3%             | 57.3%                | 5.9%            |
| Arizona                 | \$979                                   | \$139            | \$1,704              | \$177           | \$2,999  | \$1,819                          | \$256            | \$3,167              | \$329           | \$5,573 | 32.6%                         | 4.6%             | 56.8%                | 5.9%            |
| Arkansas                | \$379                                   | \$58             | \$736                | \$64            | \$1,237  | \$1,431                          | \$219            | \$2,783              | \$242           | \$4,674 | 30.6%                         | 4.7%             | 59.5%                | 5.2%            |
| California              | \$6,520                                 | \$910            | \$11,318             | \$1,179         | \$19,927 | \$2,168                          | \$302            | \$3,762              | \$392           | \$6,625 | 32.7%                         | 4.6%             | 56.8%                | 5.9%            |
| Colorado                | \$520                                   | \$75             | \$902                | \$92            | \$1,588  | \$1,962                          | \$283            | \$3,404              | \$345           | \$5,993 | 32.7%                         | 4.7%             | 56.8%                | 5.8%            |
| Connecticut             | \$455                                   | \$69             | \$869                | \$88            | \$1,482  | \$1,886                          | \$287            | \$3,598              | \$367           | \$6,138 | 30.7%                         | 4.6%             | 58.6%                | 6.0%            |
| Delaware                | \$143                                   | \$24             | \$288                | \$24            | \$480    | \$1,756                          | \$298            | \$3,537              | \$298           | \$5,889 | 29.8%                         | 5.0%             | 60.0%                | 5.0%            |
| District of<br>Columbia | \$117                                   | \$21             | \$230                | \$20            | \$387    | \$2,711                          | \$487            | \$5,363              | \$469           | \$9,031 | 30.1%                         | 5.4%             | 59.4%                | 5.1%            |
| Florida                 | \$2,360                                 | \$439            | \$4,982              | \$408           | \$8,189  | \$1,337                          | \$248            | \$2,822              | \$231           | \$4,640 | 28.8%                         | 5.4%             | 60.8%                | 5.0%            |
| Georgia                 | \$1,378                                 | \$231            | \$2,757              | \$241           | \$4,608  | \$1,664                          | \$279            | \$3,328              | \$290           | \$5,563 | 29.9%                         | 5.0%             | 59.8%                | 5.2%            |
| Hawaii                  | \$166                                   | \$26             | \$286                | \$28            | \$506    | \$1,782                          | \$276            | \$3,068              | \$307           | \$5,434 | 32.8%                         | 5.2%             | 56.5%                | 5.6%            |
| Idaho                   | \$157                                   | \$22             | \$273                | \$27            | \$478    | \$1,567                          | \$218            | \$2,717              | \$268           | \$4,771 | 32.9%                         | 4.6%             | 57.1%                | 5.7%            |
| Illinois                | \$1,763                                 | \$262            | \$2,881              | \$303           | \$5,209  | \$1,775                          | \$264            | \$2,902              | \$306           | \$5,245 | 33.8%                         | 5.0%             | 55.3%                | 5.8%            |
| Indiana                 | \$911                                   | \$120            | \$1,493              | \$155           | \$2,680  | \$1,629                          | \$215            | \$2,671              | \$277           | \$4,793 | 34.0%                         | 4.5%             | 55.7%                | 5.8%            |
| Iowa                    | \$326                                   | \$50             | \$538                | \$56            | \$969    | \$1,430                          | \$218            | \$2,359              | \$243           | \$4,250 | 33.7%                         | 5.2%             | 55.5%                | 5.7%            |
| Kansas                  | \$347                                   | \$47             | \$558                | \$59            | \$1,011  | \$1,623                          | \$218            | \$2,611              | \$277           | \$4,728 | 34.3%                         | 4.6%             | 55.2%                | 5.8%            |
| Kentucky                | \$509                                   | \$89             | \$1,037              | \$86            | \$1,721  | \$1,385                          | \$242            | \$2,819              | \$235           | \$4,680 | 29.5%                         | 5.2%             | 60.2%                | 5.0%            |
| Louisiana               | \$582                                   | \$106            | \$1,191              | \$99            | \$1,978  | \$1,392                          | \$253            | \$2,850              | \$238           | \$4,732 | 29.4%                         | 5.4%             | 60.2%                | 5.0%            |
| Maine                   | \$157                                   | \$23             | \$300                | \$32            | \$512    | \$1,502                          | \$222            | \$2,866              | \$306           | \$4,895 | 30.7%                         | 4.5%             | 58.6%                | 6.2%            |
| Maryland                | \$847                                   | \$151            | \$1,731              | \$147           | \$2,876  | \$1,841                          | \$327            | \$3,764              | \$319           | \$6,253 | 29.4%                         | 5.2%             | 60.2%                | 5.1%            |
| Massachusetts           | \$959                                   | \$141            | \$1,834              | \$194           | \$3,128  | \$2,063                          | \$303            | \$3,942              | \$418           | \$6,725 | 30.7%                         | 4.5%             | 58.6%                | 6.2%            |
| Michigan                | \$1,400                                 | \$189            | \$2,273              | \$240           | \$4,103  | \$1,741                          | \$235            | \$2,828              | \$298           | \$5,102 | 34.1%                         | 4.6%             | 55.4%                | 5.9%            |
| Minnesota               | \$552                                   | \$76             | \$898                | \$94            | \$1,622  | \$1,750                          | \$243            | \$2,850              | \$298           | \$5,142 | 34.1%                         | 4.7%             | 55.4%                | 5.8%            |
| Mississippi             | \$382                                   | \$67             | \$755                | \$64            | \$1,269  | \$1,295                          | \$227            | \$2,558              | \$218           | \$4,298 | 30.1%                         | 5.2%             | 59.5%                | 5.1%            |
| Missouri                | \$745                                   | \$107            | \$1,177              | \$128           | \$2,157  | \$1,633                          | \$235            | \$2,575              | \$278           | \$4,719 | 34.6%                         | 5.0%             | 54.6%                | 5.9%            |

SUPPLEMENTARY DATA

|                |          |         |          |         |           |         |       |         |       |         |       |      |       |      |
|----------------|----------|---------|----------|---------|-----------|---------|-------|---------|-------|---------|-------|------|-------|------|
| Montana        | \$91     | \$14    | \$157    | \$15    | \$276     | \$1,459 | \$222 | \$2,531 | \$241 | \$4,453 | 32.8% | 5.1% | 56.9% | 5.5% |
| Nebraska       | \$205    | \$27    | \$325    | \$34    | \$592     | \$1,547 | \$205 | \$2,455 | \$255 | \$4,463 | 34.7% | 4.6% | 55.0% | 5.7% |
| Nevada         | \$362    | \$46    | \$628    | \$63    | \$1,098   | \$1,759 | \$223 | \$3,048 | \$305 | \$5,336 | 33.0% | 4.2% | 57.2% | 5.8% |
| New Hampshire  | \$172    | \$24    | \$331    | \$35    | \$562     | \$1,743 | \$240 | \$3,355 | \$359 | \$5,697 | 30.7% | 4.3% | 58.8% | 6.2% |
| New Jersey     | \$1,270  | \$183   | \$2,457  | \$262   | \$4,172   | \$1,963 | \$283 | \$3,798 | \$404 | \$6,448 | 30.4% | 4.4% | 58.9% | 6.3% |
| New Mexico     | \$289    | \$41    | \$500    | \$51    | \$882     | \$1,686 | \$244 | \$2,918 | \$297 | \$5,145 | 32.8% | 4.7% | 56.7% | 5.8% |
| New York       | \$3,412  | \$515   | \$6,730  | \$720   | \$11,377  | \$2,046 | \$309 | \$4,037 | \$432 | \$6,825 | 30.0% | 4.5% | 59.2% | 6.3% |
| North Carolina | \$1,321  | \$228   | \$2,691  | \$228   | \$4,469   | \$1,512 | \$261 | \$3,081 | \$262 | \$5,114 | 29.5% | 5.1% | 60.2% | 5.1% |
| North Dakota   | \$87     | \$11    | \$142    | \$14    | \$255     | \$1,693 | \$215 | \$2,770 | \$285 | \$4,962 | 34.2% | 4.3% | 55.6% | 5.6% |
| Ohio           | \$1,498  | \$219   | \$2,403  | \$250   | \$4,370   | \$1,579 | \$230 | \$2,533 | \$263 | \$4,606 | 34.3% | 5.0% | 55.0% | 5.7% |
| Oklahoma       | \$493    | \$77    | \$996    | \$86    | \$1,653   | \$1,508 | \$237 | \$3,047 | \$264 | \$5,056 | 29.8% | 4.7% | 60.3% | 5.2% |
| Oregon         | \$534    | \$74    | \$926    | \$96    | \$1,629   | \$1,877 | \$262 | \$3,253 | \$337 | \$5,731 | 32.8% | 4.6% | 56.8% | 5.9% |
| Pennsylvania   | \$1,657  | \$259   | \$3,274  | \$346   | \$5,537   | \$1,592 | \$249 | \$3,145 | \$333 | \$5,318 | 29.9% | 4.7% | 59.1% | 6.2% |
| Rhode Island   | \$141    | \$21    | \$270    | \$28    | \$459     | \$1,778 | \$256 | \$3,389 | \$357 | \$5,779 | 30.6% | 4.5% | 58.7% | 6.2% |
| South Carolina | \$618    | \$117   | \$1,282  | \$106   | \$2,122   | \$1,322 | \$250 | \$2,743 | \$226 | \$4,539 | 29.1% | 5.5% | 60.4% | 5.0% |
| South Dakota   | \$82     | \$12    | \$134    | \$14    | \$241     | \$1,363 | \$194 | \$2,243 | \$236 | \$4,036 | 33.9% | 5.0% | 55.7% | 5.9% |
| Tennessee      | \$955    | \$152   | \$1,903  | \$165   | \$3,175   | \$1,526 | \$243 | \$3,040 | \$263 | \$5,071 | 30.1% | 4.8% | 60.0% | 5.2% |
| Texas          | \$3,772  | \$569   | \$7,257  | \$631   | \$12,228  | \$1,738 | \$262 | \$3,342 | \$290 | \$5,632 | 30.8% | 4.7% | 59.3% | 5.2% |
| Utah           | \$244    | \$36    | \$420    | \$41    | \$743     | \$1,675 | \$247 | \$2,882 | \$287 | \$5,092 | 32.9% | 4.8% | 56.5% | 5.6% |
| Vermont        | \$63     | \$10    | \$126    | \$13    | \$212     | \$1,591 | \$237 | \$3,144 | \$322 | \$5,293 | 29.9% | 4.6% | 59.3% | 6.2% |
| Virginia       | \$1,209  | \$196   | \$2,435  | \$208   | \$4,048   | \$1,882 | \$306 | \$3,790 | \$324 | \$6,302 | 29.9% | 4.9% | 60.2% | 5.1% |
| Washington     | \$930    | \$140   | \$1,624  | \$158   | \$2,852   | \$1,986 | \$298 | \$3,467 | \$338 | \$6,090 | 32.6% | 4.9% | 56.9% | 5.5% |
| West Virginia  | \$259    | \$45    | \$532    | \$45    | \$880     | \$1,323 | \$229 | \$2,715 | \$227 | \$4,495 | 29.4% | 5.1% | 60.4% | 5.1% |
| Wisconsin      | \$571    | \$85    | \$935    | \$97    | \$1,688   | \$1,528 | \$229 | \$2,505 | \$261 | \$4,523 | 33.8% | 5.0% | 55.4% | 5.8% |
| Wyoming        | \$67     | \$10    | \$115    | \$11    | \$203     | \$1,698 | \$255 | \$2,922 | \$286 | \$5,161 | 32.8% | 4.8% | 56.5% | 5.4% |
| United States  | \$43,809 | \$6,695 | \$81,255 | \$7,869 | \$139,628 | \$1,732 | \$265 | \$3,213 | \$311 | \$5,520 | 31.4% | 4.8% | 58.2% | 5.6% |

**Summary:**

|        |         |       |          |         |          |         |       |         |       |         |
|--------|---------|-------|----------|---------|----------|---------|-------|---------|-------|---------|
| Median | \$520   | \$76  | \$926    | \$92    | \$1,629  | \$1,675 | \$248 | \$2,922 | \$290 | \$5,142 |
| Min    | \$63    | \$10  | \$115    | \$11    | \$203    | \$1,295 | \$194 | \$2,243 | \$218 | \$4,036 |
| Max    | \$6,520 | \$910 | \$11,318 | \$1,179 | \$19,927 | \$2,711 | \$487 | \$5,363 | \$469 | \$9,031 |

SUPPLEMENTARY DATA

**Supplementary Table S3.** Annual Diabetes-Attributable Premature Mortality Costs by State and Component, 2017

| State                | Total Mortality Costs       |                        |          | Mortality Costs Per Patient |                        |         | Percentage of Total |                        |
|----------------------|-----------------------------|------------------------|----------|-----------------------------|------------------------|---------|---------------------|------------------------|
|                      | (in millions, 2017 dollars) |                        |          | (2017 dollars)              |                        |         | Labor Productivity  | Household Productivity |
|                      | Labor Productivity          | Household Productivity | Total    | Labor Productivity          | Household Productivity | Total   |                     |                        |
| Alabama              | \$1,854                     | \$879                  | \$2,733  | \$3,545                     | \$1,679                | \$5,223 | 68%                 | 32%                    |
| Alaska               | \$163                       | \$72                   | \$235    | \$4,138                     | \$1,841                | \$5,978 | 69%                 | 31%                    |
| Arizona              | \$1,639                     | \$753                  | \$2,393  | \$3,047                     | \$1,400                | \$4,447 | 68%                 | 31%                    |
| Arkansas             | \$930                       | \$421                  | \$1,351  | \$3,517                     | \$1,593                | \$5,110 | 69%                 | 31%                    |
| California           | \$8,629                     | \$4,088                | \$12,716 | \$2,868                     | \$1,359                | \$4,227 | 68%                 | 32%                    |
| Colorado             | \$765                       | \$359                  | \$1,124  | \$2,886                     | \$1,357                | \$4,242 | 68%                 | 32%                    |
| Connecticut          | \$666                       | \$330                  | \$996    | \$2,756                     | \$1,366                | \$4,123 | 67%                 | 33%                    |
| Delaware             | \$280                       | \$132                  | \$413    | \$3,435                     | \$1,621                | \$5,055 | 68%                 | 32%                    |
| District of Columbia | \$258                       | \$126                  | \$383    | \$6,008                     | \$2,923                | \$8,931 | 67%                 | 33%                    |
| Florida              | \$4,371                     | \$2,174                | \$6,545  | \$2,476                     | \$1,232                | \$3,709 | 67%                 | 33%                    |
| Georgia              | \$2,426                     | \$1,268                | \$3,694  | \$2,928                     | \$1,531                | \$4,459 | 66%                 | 34%                    |
| Hawaii               | \$246                       | \$115                  | \$360    | \$2,639                     | \$1,227                | \$3,866 | 68%                 | 32%                    |
| Idaho                | \$263                       | \$124                  | \$386    | \$2,618                     | \$1,240                | \$3,857 | 68%                 | 32%                    |
| Illinois             | \$2,745                     | \$1,417                | \$4,162  | \$2,763                     | \$1,426                | \$4,191 | 66%                 | 34%                    |
| Indiana              | \$1,716                     | \$838                  | \$2,554  | \$3,069                     | \$1,498                | \$4,566 | 67%                 | 33%                    |
| Iowa                 | \$512                       | \$271                  | \$783    | \$2,246                     | \$1,186                | \$3,432 | 65%                 | 35%                    |
| Kansas               | \$577                       | \$279                  | \$858    | \$2,703                     | \$1,308                | \$4,012 | 67%                 | 33%                    |
| Kentucky             | \$1,215                     | \$602                  | \$1,817  | \$3,304                     | \$1,637                | \$4,942 | 67%                 | 33%                    |
| Louisiana            | \$1,401                     | \$701                  | \$2,103  | \$3,355                     | \$1,679                | \$5,032 | 67%                 | 33%                    |
| Maine                | \$275                       | \$133                  | \$408    | \$2,629                     | \$1,268                | \$3,897 | 67%                 | 33%                    |
| Maryland             | \$1,440                     | \$716                  | \$2,156  | \$3,130                     | \$1,555                | \$4,686 | 67%                 | 33%                    |
| Massachusetts        | \$1,398                     | \$677                  | \$2,075  | \$3,006                     | \$1,456                | \$4,462 | 67%                 | 33%                    |
| Michigan             | \$2,532                     | \$1,221                | \$3,752  | \$3,149                     | \$1,518                | \$4,667 | 67%                 | 33%                    |
| Minnesota            | \$747                       | \$377                  | \$1,122  | \$2,365                     | \$1,193                | \$3,558 | 67%                 | 34%                    |
| Mississippi          | \$1,004                     | \$480                  | \$1,484  | \$3,401                     | \$1,624                | \$5,025 | 68%                 | 32%                    |
| Missouri             | \$1,442                     | \$702                  | \$2,144  | \$3,154                     | \$1,536                | \$4,691 | 67%                 | 33%                    |
| Montana              | \$166                       | \$80                   | \$246    | \$2,674                     | \$1,288                | \$3,962 | 68%                 | 32%                    |
| Nebraska             | \$299                       | \$148                  | \$447    | \$2,257                     | \$1,119                | \$3,376 | 67%                 | 33%                    |

SUPPLEMENTARY DATA

|                 |          |          |           |         |         |         |     |     |
|-----------------|----------|----------|-----------|---------|---------|---------|-----|-----|
| Nevada          | \$668    | \$310    | \$978     | \$3,243 | \$1,507 | \$4,750 | 68% | 32% |
| New Hampshire   | \$261    | \$123    | \$384     | \$2,647 | \$1,250 | \$3,896 | 68% | 32% |
| New Jersey      | \$1,924  | \$938    | \$2,861   | \$2,973 | \$1,448 | \$4,421 | 67% | 33% |
| New Mexico      | \$542    | \$246    | \$788     | \$3,164 | \$1,434 | \$4,599 | 69% | 31% |
| New York        | \$4,919  | \$2,480  | \$7,399   | \$2,951 | \$1,488 | \$4,438 | 66% | 34% |
| North Carolina  | \$2,535  | \$1,262  | \$3,797   | \$2,902 | \$1,444 | \$4,345 | 67% | 33% |
| North Dakota    | \$143    | \$64     | \$207     | \$2,775 | \$1,259 | \$4,035 | 69% | 31% |
| Ohio            | \$2,855  | \$1,443  | \$4,297   | \$3,009 | \$1,520 | \$4,529 | 66% | 34% |
| Oklahoma        | \$1,245  | \$573    | \$1,818   | \$3,809 | \$1,754 | \$5,562 | 68% | 32% |
| Oregon          | \$876    | \$413    | \$1,289   | \$3,081 | \$1,453 | \$4,534 | 68% | 32% |
| Pennsylvania    | \$3,017  | \$1,514  | \$4,532   | \$2,899 | \$1,455 | \$4,354 | 67% | 33% |
| Rhode Island    | \$241    | \$115    | \$356     | \$3,037 | \$1,438 | \$4,476 | 68% | 32% |
| South Carolina  | \$1,352  | \$688    | \$2,040   | \$2,893 | \$1,470 | \$4,363 | 66% | 34% |
| South Dakota    | \$123    | \$61     | \$184     | \$2,074 | \$1,023 | \$3,097 | 67% | 33% |
| Tennessee       | \$2,197  | \$1,036  | \$3,233   | \$3,509 | \$1,653 | \$5,162 | 68% | 32% |
| Texas           | \$6,710  | \$3,062  | \$9,772   | \$3,090 | \$1,410 | \$4,501 | 69% | 31% |
| Utah            | \$348    | \$175    | \$523     | \$2,390 | \$1,194 | \$3,584 | 67% | 33% |
| Vermont         | \$102    | \$51     | \$153     | \$2,538 | \$1,293 | \$3,831 | 66% | 34% |
| Virginia        | \$1,990  | \$980    | \$2,969   | \$3,096 | \$1,525 | \$4,622 | 67% | 33% |
| Washington      | \$1,352  | \$677    | \$2,029   | \$2,888 | \$1,445 | \$4,332 | 67% | 33% |
| West Virginia   | \$647    | \$315    | \$963     | \$3,305 | \$1,614 | \$4,919 | 67% | 33% |
| Wisconsin       | \$885    | \$463    | \$1,348   | \$2,371 | \$1,239 | \$3,609 | 66% | 34% |
| Wyoming         | \$111    | \$55     | \$166     | \$2,844 | \$1,381 | \$4,225 | 67% | 33% |
| United States   | \$75,001 | \$36,523 | \$111,524 | \$2,965 | \$1,444 | \$4,409 | 67% | 33% |
| <b>Summary:</b> |          |          |           |         |         |         |     |     |
| Median          | \$930    | \$463    | \$1,351   | \$2,951 | \$1,445 | \$4,438 |     |     |
| Min             | \$102    | \$51     | \$153     | \$2,074 | \$1,023 | \$3,097 |     |     |
| Max             | \$8,629  | \$4,088  | \$12,716  | \$6,008 | \$2,923 | \$8,931 |     |     |

SUPPLEMENTARY DATA

**Supplementary Table S4.** Diabetes prevalence and diabetes attributable fraction for medical cost among adults, 2013.

| <b>State</b>         | <b>Diabetes Prevalence<sup>a</sup></b> | <b>Diabetes Attributable Fraction<sup>b</sup></b> |
|----------------------|----------------------------------------|---------------------------------------------------|
| Alabama              | 14.0%                                  | 12.4%                                             |
| Alaska               | 7.2%                                   | 5.8%                                              |
| Arizona              | 10.9%                                  | 8.7%                                              |
| Arkansas             | 11.8%                                  | 9.8%                                              |
| California           | 10.4%                                  | 8.3%                                              |
| Colorado             | 6.6%                                   | 6.3%                                              |
| Connecticut          | 8.5%                                   | 8.0%                                              |
| Delaware             | 11.4%                                  | 9.0%                                              |
| District of Columbia | 7.9%                                   | 7.6%                                              |
| Florida              | 11.4%                                  | 9.6%                                              |
| Georgia              | 11.0%                                  | 9.6%                                              |
| Hawaii               | 8.5%                                   | 7.5%                                              |
| Idaho                | 8.5%                                   | 6.9%                                              |
| Illinois             | 10.2%                                  | 8.6%                                              |
| Indiana              | 11.1%                                  | 9.1%                                              |
| Iowa                 | 9.5%                                   | 8.5%                                              |
| Kansas               | 9.8%                                   | 8.6%                                              |
| Kentucky             | 10.9%                                  | 9.7%                                              |
| Louisiana            | 11.9%                                  | 10.4%                                             |
| Maine                | 9.7%                                   | 9.0%                                              |
| Maryland             | 10.0%                                  | 8.7%                                              |
| Massachusetts        | 8.7%                                   | 8.0%                                              |
| Michigan             | 10.6%                                  | 9.3%                                              |
| Minnesota            | 7.6%                                   | 6.9%                                              |
| Mississippi          | 13.1%                                  | 11.6%                                             |
| Missouri             | 9.8%                                   | 9.2%                                              |
| Montana              | 7.8%                                   | 6.5%                                              |
| Nebraska             | 9.4%                                   | 8.1%                                              |
| Nevada               | 9.8%                                   | 8.6%                                              |
| New Hampshire        | 9.4%                                   | 7.6%                                              |
| New Jersey           | 9.3%                                   | 8.2%                                              |
| New Mexico           | 11.0%                                  | 8.7%                                              |
| New York             | 10.8%                                  | 9.6%                                              |
| North Carolina       | 11.6%                                  | 9.9%                                              |
| North Dakota         | 9.1%                                   | 6.8%                                              |
| Ohio                 | 10.6%                                  | 9.3%                                              |
| Oklahoma             | 11.2%                                  | 10.1%                                             |
| Oregon               | 9.4%                                   | 7.9%                                              |
| Pennsylvania         | 10.3%                                  | 9.3%                                              |
| Rhode Island         | 9.5%                                   | 9.0%                                              |
| South Carolina       | 12.8%                                  | 10.8%                                             |

## SUPPLEMENTARY DATA

|                 |       |       |
|-----------------|-------|-------|
| South Dakota    | 9.3%  | 6.9%  |
| Tennessee       | 12.4% | 10.7% |
| Texas           | 11.2% | 8.9%  |
| Utah            | 7.2%  | 6.0%  |
| Vermont         | 8.0%  | 6.6%  |
| Virginia        | 10.0% | 8.6%  |
| Washington      | 8.8%  | 7.2%  |
| West Virginia   | 13.3% | 11.4% |
| Wisconsin       | 8.4%  | 7.5%  |
| Wyoming         | 8.8%  | 7.1%  |
| United States   | 10.4% | 7.9%  |
| <b>Summary:</b> |       |       |
| Median          | 9.8%  | 8.6%  |
| Min             | 6.6%  | 5.8%  |
| Max             | 14.0% | 12.4% |

### Notes:

<sup>a</sup>Diabetes prevalence was estimated from 2013 BRFSS for adults aged 19 and above.

<sup>b</sup>Diabetes attributable fraction for medical costs estimated as state-specific estimated total medical cost for noninstitutionalized and institutionalized adult population in 2013/personal health care expenditure in 2013\*100. State-specific personal health care expenditures was from State Health Expenditure account data from CMS (<https://www.cms.gov/Research-Statistics-Data-and-Systems/Statistics-Trends-and-Reports/NationalHealthExpendData/NationalHealthAccountsStateHealthAccountsResidence.html> on July 20, 2018). The correlation between diabetes prevalence and the diabetes attributable fraction for medical cost was 0.95 ( $p < 0.001$ )
